# Supplementary material for: Simultaneous electrochemical determination of acetaminophen, caffeine and ascorbic acid using a new electrochemical sensor based on CuO–graphene nanocomposite
Source: Royal Society of Chemistry journal article supplement (doi:10.1039/c5ra14138a), 2015-01-01
Supplement: c5ra14138a1.pdf [file c5ra14138a1.pdf]

**Simultaneous electrochemical determination of acetaminophen, caffeine and ascorbic acid using a new electrochemical sensor based on CuO-graphene nanocomposite**

This document contains the following supplementary figures and information:

Fig. S1. XPS spectra of Gr

Fig. S2. Overlay of cyclic voltammograms of (a) CPE and (b) CuO-Gr/CPE in  $1.0 \times 10^{-3} \text{ mol L}^{-1}$   $\text{K}_4[\text{Fe}(\text{CN})_6]$  and 0.1 M KCl at different scan rate, Scan rates: 50, 100, 125, 150, 200, 250, 300, 400  $\text{mV s}^{-1}$  (from bottom to top).

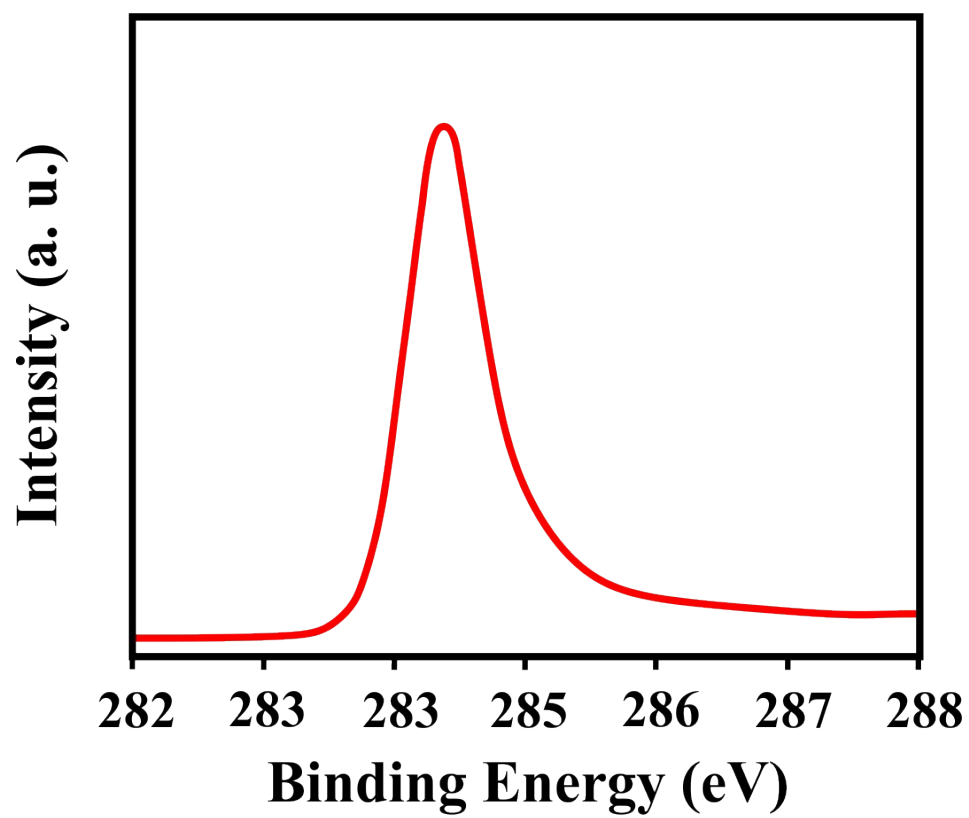

Fig. S1. XPS spectra of Gr

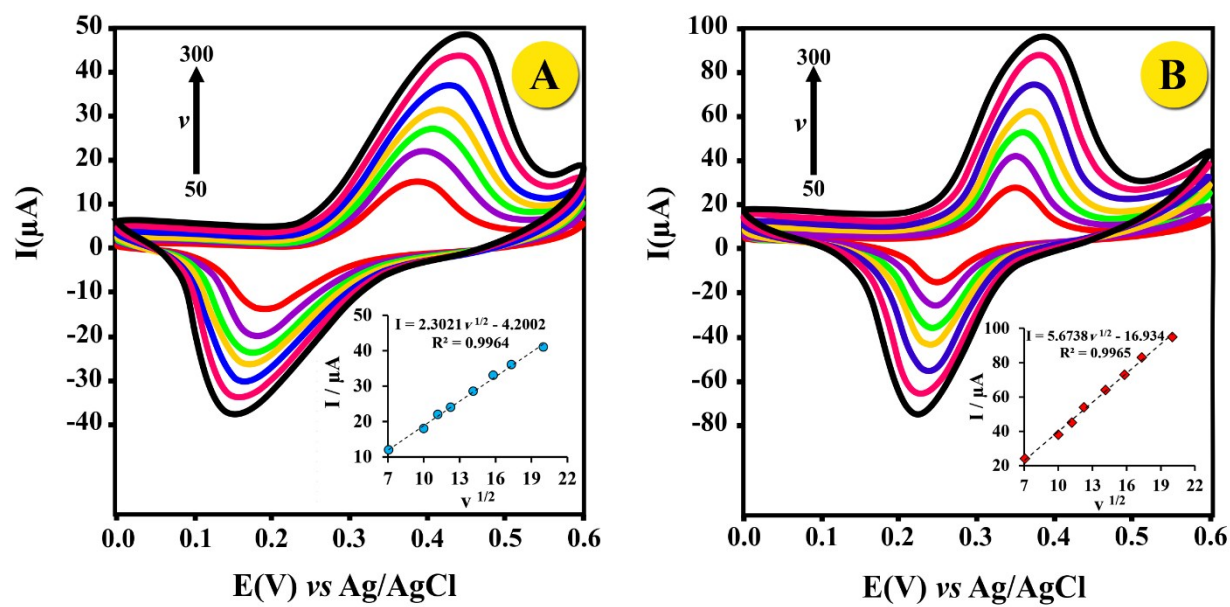

Fig. S2. Overlay of cyclic voltammograms of (a) CPE and (b) CuO-Gr/CPE in  $1.0 \times 10^{-3} \text{ mol L}^{-1} \text{ K}_4[\text{Fe}(\text{CN})_6]$  and 0.1 M KCl at different scan rate, Scan rates: 50, 100, 125, 150, 200, 250, 300, 400  $\text{mV s}^{-1}$  (from bottom to top).
